# Supplementary material for: Configuration and conformation of poly(3-carbazolylacetylene) including cis and trans radicals revealed by ESR spectroscopy
Source: Royal Society of Chemistry journal article supplement (doi:10.1039/c5py01200g), 2015-01-01
Supplement: c5py01200g1.pdf [file c5py01200g1.pdf]

## Supplementary Information

# Configuration and Conformation of Poly(3-carbazolylacetylene) Including *Cis* and *Trans* Radicals Revealed by ESR Spectroscopy

Takahiro Sasaki,<sup>a</sup> Yasuteru Mawatari,\*<sup>a,b</sup> and Masayoshi Tabata\*<sup>c</sup>

<sup>a</sup> *Department of Applied Chemistry, Graduate School of Engineering, Muroran Institute of Technology, 27-1 Mizumoto-cho, Muroran, Hokkaido 050-8585, Japan*

<sup>b</sup> *Research Center for Environmentally Friendly Materials Engineering, Muroran Institute of Technology, 27-1 Mizumoto-cho, Muroran, Hokkaido 050-8585, Japan*

<sup>c</sup> *Center of Environmental Science and Disaster for Advanced Research, Muroran Institute of Technology, 27-1 Mizumoto-cho, Muroran, Hokkaido 050-8585, Japan*

E mail: mawatari@mmm.muroran-it.ac.jp

tabata@mmm.muroran-it.ac.jp.

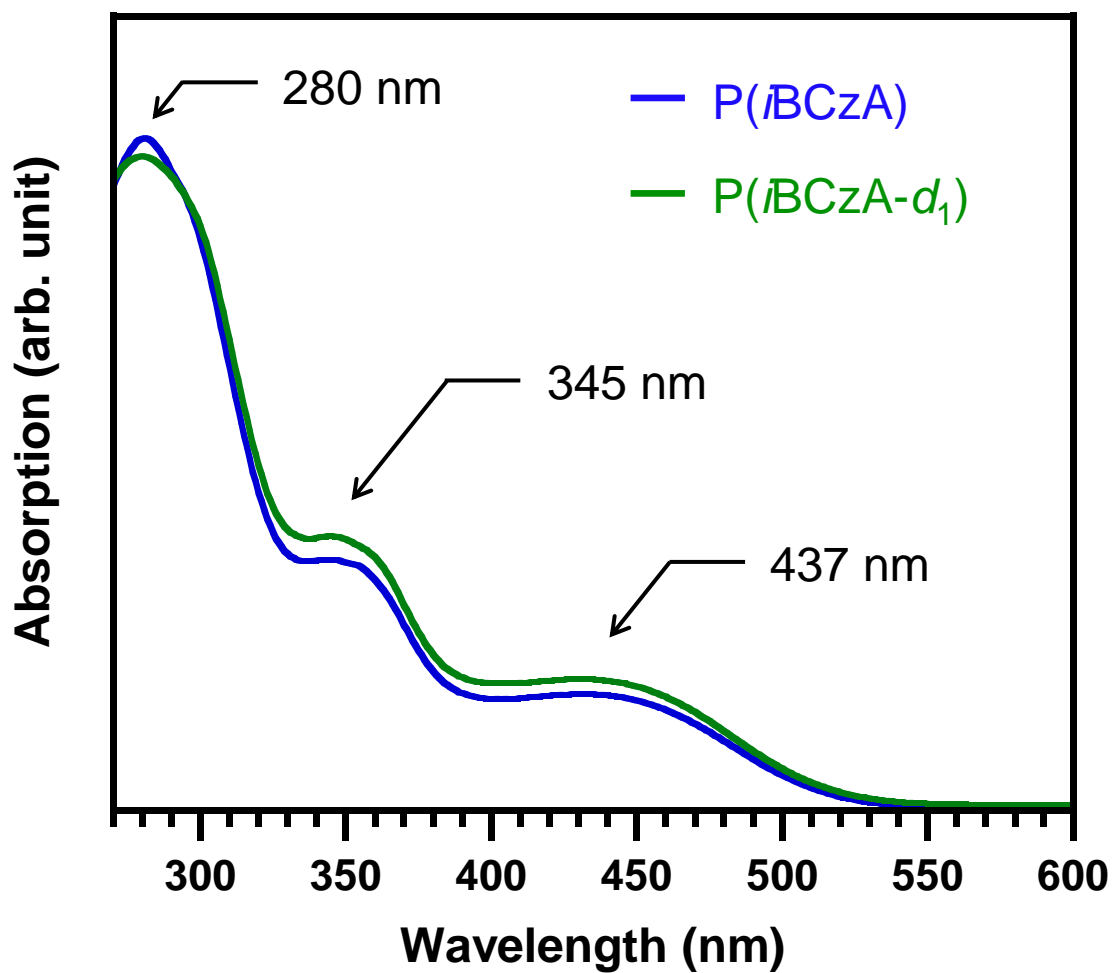

**Fig. S1** UV-vis spectra of P(*i*BCzA) and P(*i*BCzA-*d*<sub>1</sub>) measured in CCl<sub>4</sub> at room temperature.
